# Supporting Figure S4

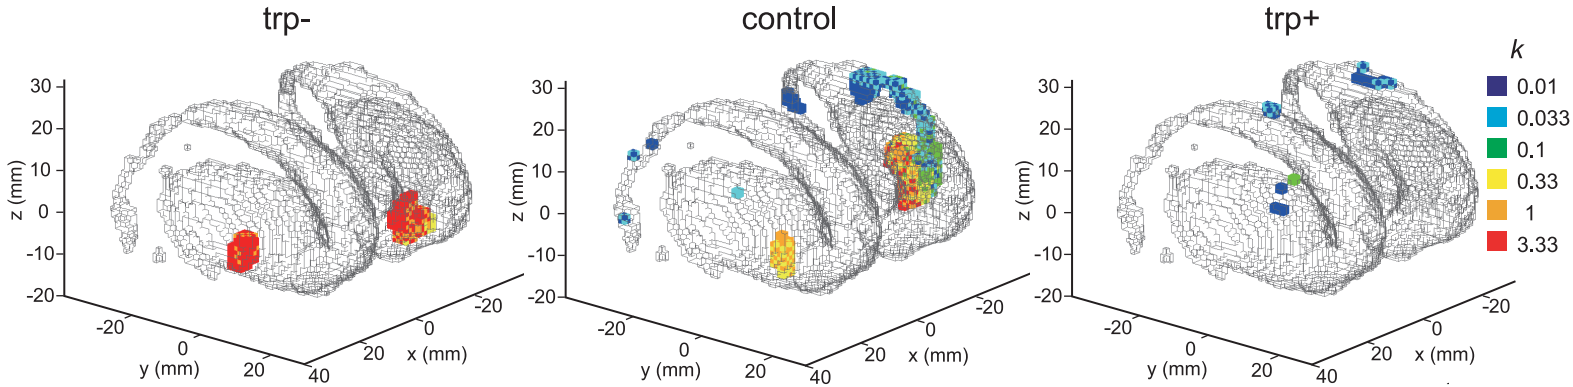

Source: https://storage.googleapis.com/plos-corpus-prod/10.1371/journal.pone.0001333/1/pone.0001333.s005.pdf
