# Supplementary material for: Serotonin Differentially Regulates Short- and Long-Term Prediction of Rewards in the Ventral and Dorsal Striatum
Source: PLOS journal article supplement (doi:10.1371/journal.pone.0001333), 2007-12-18

# Supporting Figure S1

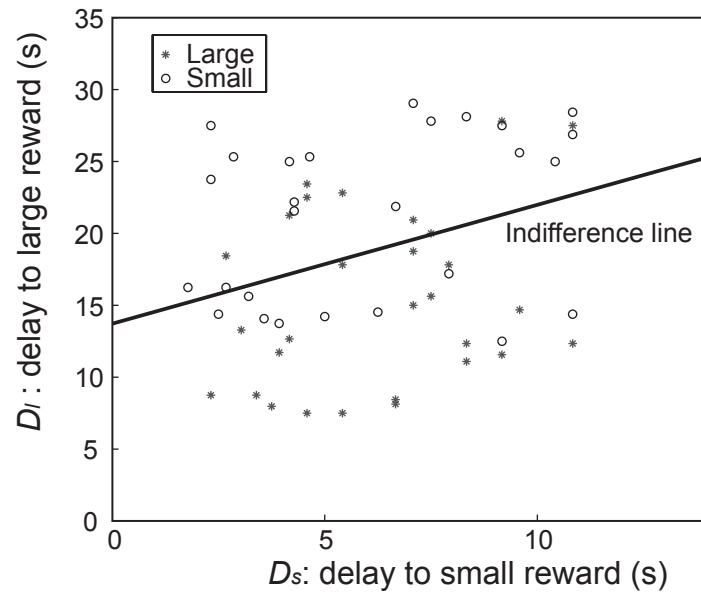

Supplement: S2 (10.1371/journal.pone.0001333.s002) [file journal.pone.0001333.s002]
